# Supplementary material for: MicroRNA-19b Downregulates Gap Junction Protein Alpha1 and Synergizes with MicroRNA-1 in Viral Myocarditis
Source: MDPI journal article supplement (doi:10.3390/ijms17050741), 2016-05-18
Supplement: s1 [file s1]

# Supplementary Materials: MicroRNA-19b Downregulates Gap Junction Protein Alpha1 and Synergizes with MicroRNA-1 in Viral Myocarditis

Junyi Lin, Aimin Xue, Liliang Li, Beixu Li, Yuhua Li, Yiwen Shen, Ning Sun, Ruizhen Chen, Hongfei Xu and Ziqin Zhao

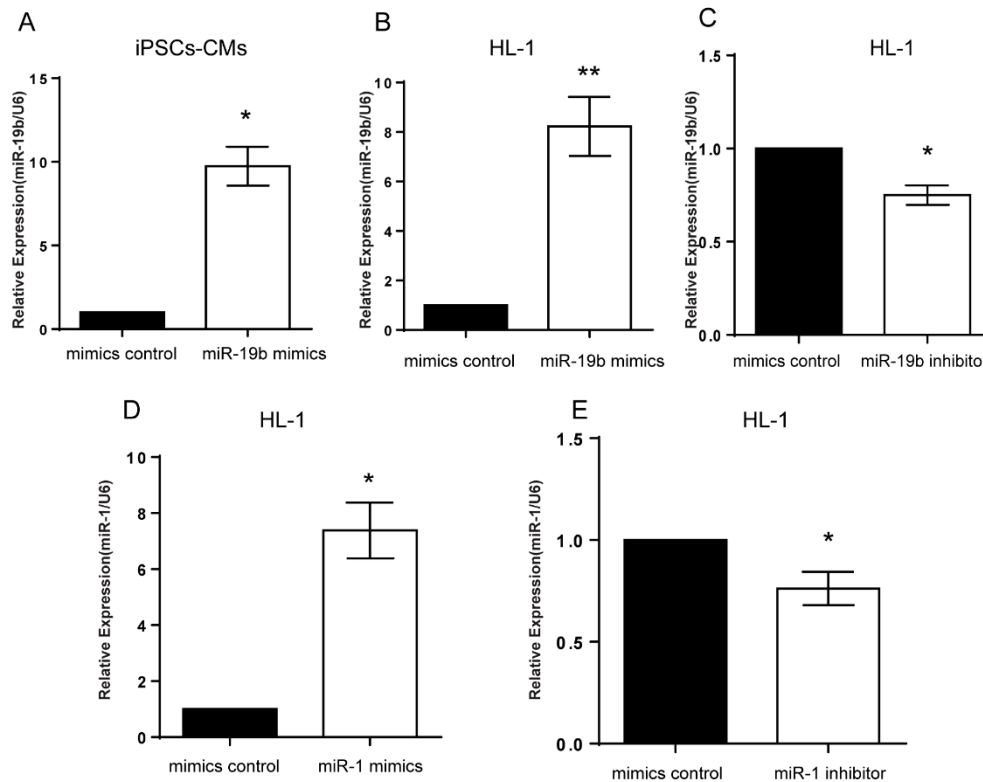

**Figure S1.** Transfection efficiency of miR-19b and miR-1 in iPSCs-CMs and HL-1 cells. (A) The transfection efficiency of miR-19b in iPSCs-CMs; (B,C) The transfection efficiency of miR-19b in HL-1; (D,E) The transfection efficiency.  $n = 3$  per group. \*  $p < 0.05$ , \*\*  $p < 0.01$ .
